# Supplementary material for: Synthesis of cambered nano-walls of SnO2/rGO composites using a recyclable melamine template for lithium-ion batteries
Source: Royal Society of Chemistry journal article supplement (doi:10.1039/c5ta03166d), 2015-01-01
Supplement: c5ta03166d1.pdf [file c5ta03166d1.pdf]

Supplementary Information

**Synthesis of Cambered Nano-walls of SnO<sub>2</sub>/rGO Composites Using a Recyclable Melamine Template for Lithium-Ion Batteries**

Rixing Shen<sup>a</sup>, Yanzhong Hong<sup>a</sup>, Joseph J. Stankovich<sup>b</sup>, Zhiyong Wang<sup>a</sup>, Sheng Dai<sup>b</sup> and Xianbo Jin<sup>a\*</sup>

<sup>a</sup>College of Chemistry and Molecular Sciences, Hubei Key Laboratory of Electrochemical Power Sources, Wuhan University, Wuhan, 430072, P.R. China. E-mail: [xbjin@whu.edu.cn](mailto:xbjin@whu.edu.cn); Fax: +86-027-68756319; Tel: +86-027-68756319

<sup>b</sup>Oak Ridge National Laboratory, Oak Ridge, TN 37831, USA

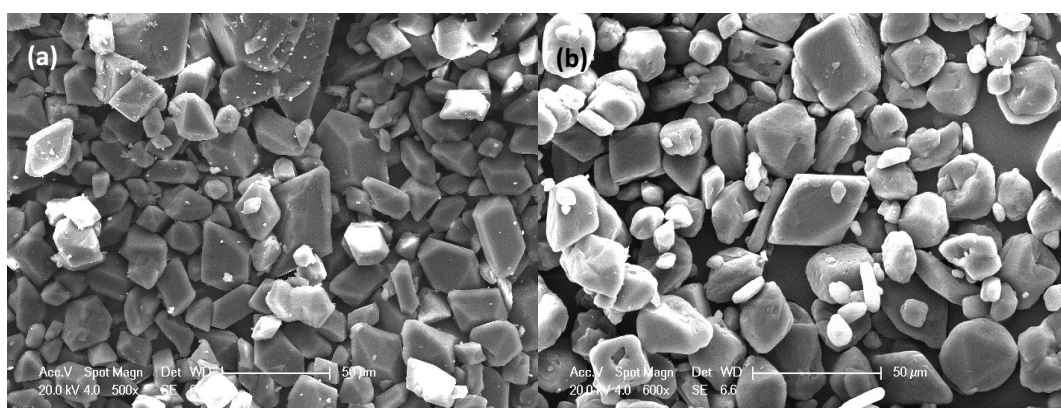

**Fig. S1** Melamine powders before (a) and after (b) soaking in pure water at room temperature.

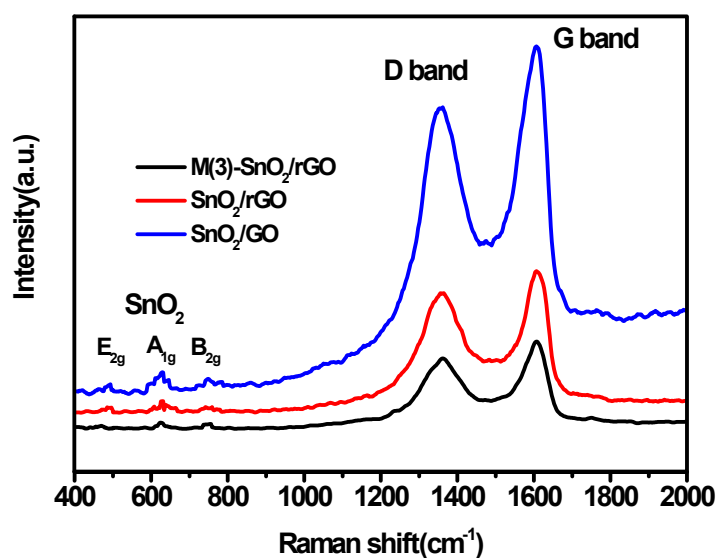

**Fig. S2a** Raman spectra of the M(3)-SnO<sub>2</sub>/rGO, SnO<sub>2</sub>/rGO and SnO<sub>2</sub>/GO composites.

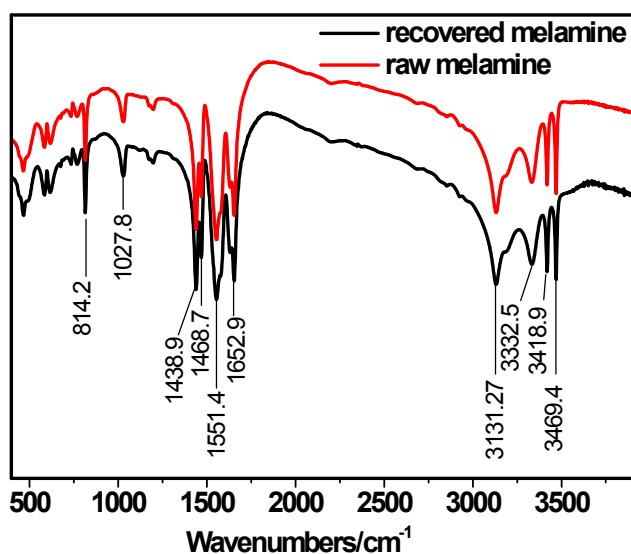

**Fig. S2b** The FTIR spectra of the original melamine and the recovered melamine from melamine@SnO<sub>2</sub>/rGO.

It indicated that the melamine has no changes during synthesis with acting as template. The intense bands at 3470-3120 cm<sup>-1</sup> assigned to typical stretching vibration modes of N-H, 1651 cm<sup>-1</sup> assigned to N-H bending vibration and 1027 cm<sup>-1</sup> due to N-H torsional vibration. The bands at 1551-1436 cm<sup>-1</sup> correspond to the stretching vibration of triazin ring. The spectrum depicted a peak at 814 cm<sup>-1</sup> which corresponds to the deformation vibration absorption of triazin ring.<sup>1</sup>

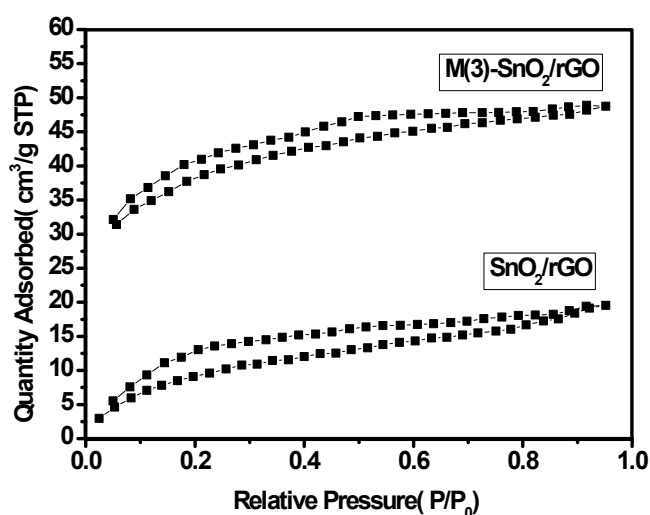

**Fig. S3** Nitrogen adsorption–desorption isotherms of M(3)-SnO<sub>2</sub>/rGO and SnO<sub>2</sub>/rGO.

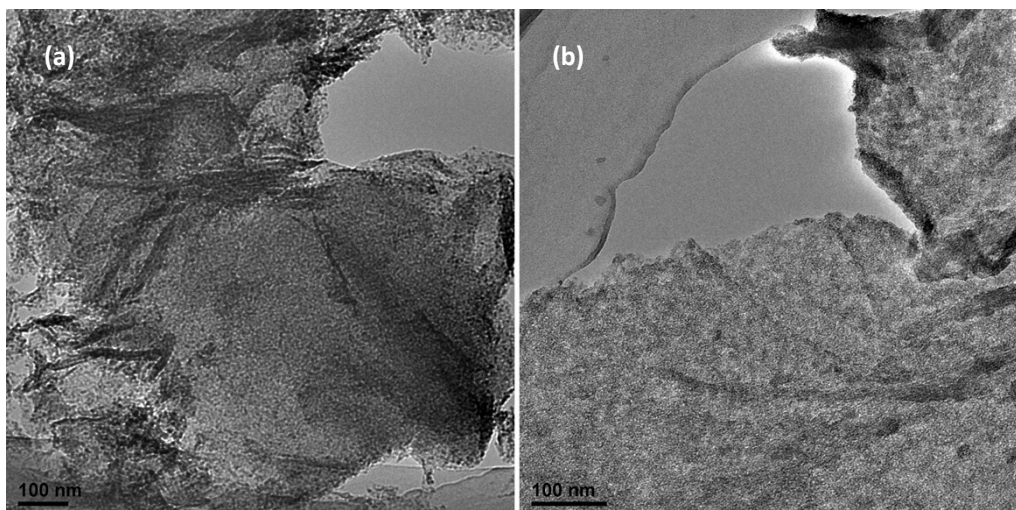

Fig. S4 TEM images of SnO<sub>2</sub>/rGO (a) and M(3)-SnO<sub>2</sub>/rGO (b).

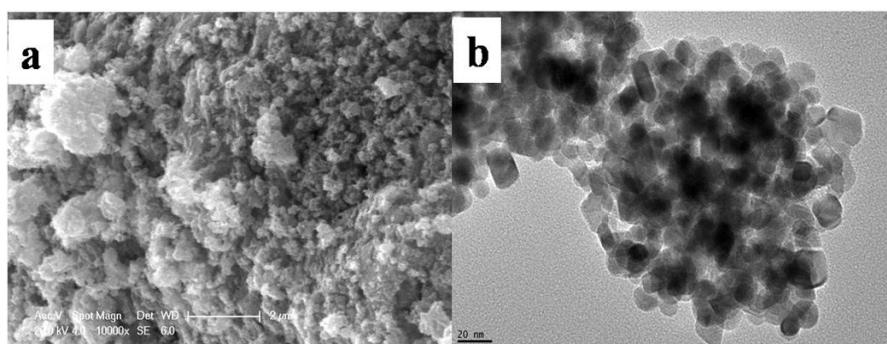

Fig. S5 SEM (a) and TEM (b) images of bare SnO<sub>2</sub>.

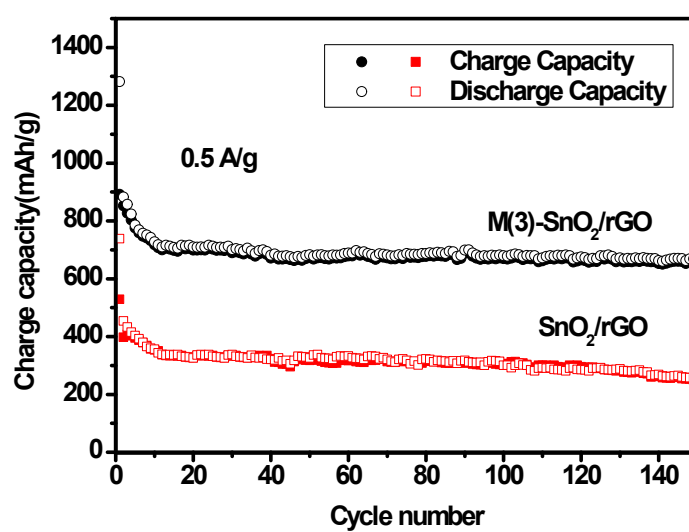

Fig. S6 Plots of charge capacities of M(3)-SnO<sub>2</sub>/rGO and SnO<sub>2</sub>/rGO composites during cycling at a current density of 0.5 A/g between 0.02-3.00V.

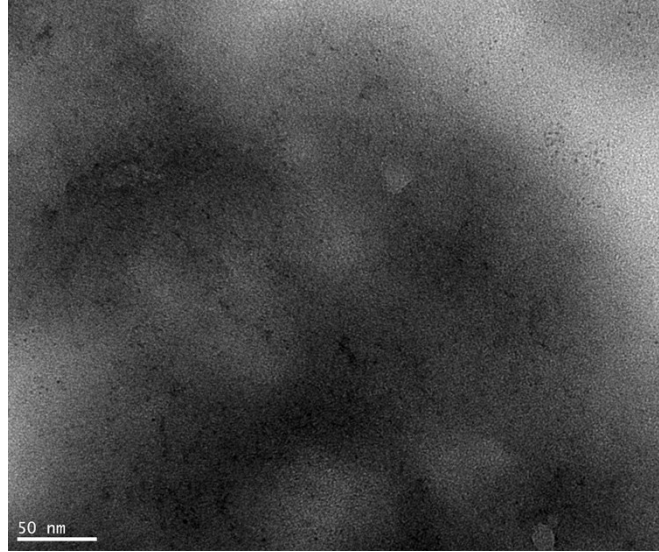

**Fig. S7** TEM image of the M(3)-SnO<sub>2</sub>/rGO sample torn off from the electrode after 100 charge/discharge cycles at a current density of 0.1 A/g between 0.02-3.00V.

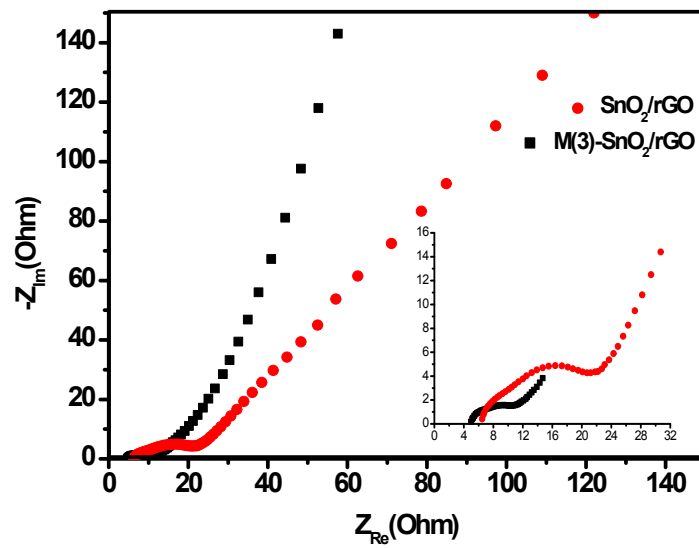

**Fig. S8** AC impedance spectra of the M(3)-SnO<sub>2</sub>/rGO and SnO<sub>2</sub>/rGO electrodes after 100 charge/discharge cycles at a current density of 0.1 A/g between 0.02-3.00V.

The lithium ion diffusion coefficient can be calculated from the formula as following:

$$D = R^2 T^2 / 2 A^2 n^4 F^4 C^2 \sigma^2$$

Where  $A$  is the surface area of the electrode,  $n$  is the number of the electrons per molecule attending the electronic transfer reaction,  $F$  is the Faraday constant,  $C$  is the concentration of lithium ion in electrode,  $R$  is the gas constant,  $T$  is the room temperature in our experiment,  $\sigma$  is the slop of the line  $Z_{Re} \sim \omega^{-1/2}$ , respectively.<sup>2-4</sup>

**Table. S1** The charge and discharge performance of M(x)- SnO<sub>2</sub>/rGO, SnO<sub>2</sub>/rGO and bare SnO<sub>2</sub>.

| Material                   | Initial charge capacity (mAh/g) | Initial discharge capacity (mAh/g) | Initial coulombic efficiency (%) | 100 <sup>th</sup> charge capacity (mAh/g) |
|----------------------------|---------------------------------|------------------------------------|----------------------------------|-------------------------------------------|
| M(5)-SnO <sub>2</sub> /rGO | 1000.2                          | 1567.8                             | 63.8                             | 845.7                                     |
| M(3)-SnO <sub>2</sub> /rGO | 998.1                           | 1556.8                             | 64.1                             | 854.9                                     |
| M(2)-SnO <sub>2</sub> /rGO | 963.8                           | 1560.9                             | 61.7                             | 744.6                                     |
| M(1)-SnO <sub>2</sub> /rGO | 872.4                           | 1490.8                             | 58.5                             | 687.2                                     |
| SnO <sub>2</sub> /rGO      | 738.7                           | 1670.7                             | 44.2                             | 535.8                                     |
| SnO <sub>2</sub>           | 884.7                           | 1474.8                             | 47.9                             | 30.8                                      |

## References

- 1 N. E. Mircescu, M. Oltean, V. Chiş and N. Leopold, *Vibrational Spectroscopy*, 2012, **62**, 165-171.
2. X. Zhou, J. Shi, Y. Liu, Q. Su, J. Zhang and G. Du, *Journal of Alloys and Compounds*, 2014, **615**, 390-394.
3. S. Li, B. Wang, J. Liu and M. Yu, *Electrochimica Acta*, 2014, **129**, 33-39.
4. Y.-J. Gu, Z. Guo and H.-Q. Liu, *Electrochimica Acta*, 2014, **123**, 576-581.
